# Supplementary figures and images for: Carbonized phenanthroline functionalized carbon as an alternative support: a strategy to intensify Pt activity and durability for methanol oxidation
Source: Royal Society of Chemistry journal article supplement (doi:10.1039/c4ra14790a), 2015-01-01

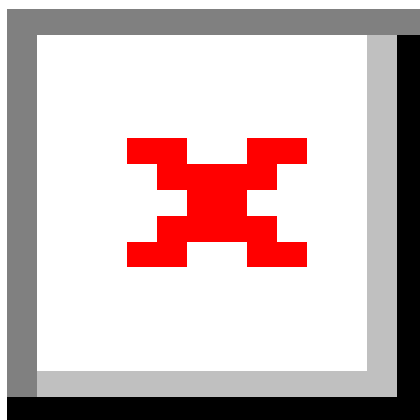

**Fig. S1** Raman spectra of carbon and CPF-C.

Supplement: c4ra14790a1.pdf [file c4ra14790a1.pdf]
